# Supplementary material for: Estimating the Effects of Habitat and Biological Interactions in an Avian Community
Source: PubMed Central journal article supplement (PMC4543583; doi:10.1371/journal.pone.0135987), 2015-08-19
Supplement: pone.0135987.s004.pdf [file pone.0135987.s004.pdf]

# Estimating the effects of habitat and biological interactions in an avian community

**Robert M. Dorazio**, U.S. Geological Survey, Southeast Ecological Science Center, Gainesville, FL, USA

**Edward F. Connor**, Department of Biology, San Francisco State University, San Francisco, CA, USA

**Robert A. Askins**, Biology Department, Connecticut College, New London, CT USA

## S1 Table: List of species

List of species (with habitat) observed at survey locations. Habitat categories are based on detailed descriptions of habitat use of New England bird species published by [1].

| Scientific name                  | Common name               | Habitat          |
|----------------------------------|---------------------------|------------------|
| <i>Long-distance migrants</i>    |                           |                  |
| <i>Buteo platypterus</i>         | Broad-winged Hawk         | forest           |
| <i>Coccyzus americanus</i>       | Yellow-billed Cuckoo      | early succession |
| <i>Coccyzus erythrophthalmus</i> | Black-billed Cuckoo       | early succession |
| <i>Antrostomus vociferus</i>     | Eastern Whip-poor-will    | young forest     |
| <i>Archilochus colubris</i>      | Ruby-throated Hummingbird | early succession |
| <i>Contopus virens</i>           | Eastern Wood-Pewee        | forest           |
| <i>Empidonax virescens</i>       | Acadian Flycatcher        | forest           |
| <i>Myiarchus crinitus</i>        | Great Crested Flycatcher  | forest           |
| <i>Tyrannus tyrannus</i>         | Eastern Kingbird          | open             |
| <i>Vireo flavifrons</i>          | Yellow-throated Vireo     | forest           |
| <i>Vireo olivaceus</i>           | Red-eyed Vireo            | forest           |
| <i>Polioptila caerulea</i>       | Blue-gray Gnatcatcher     | forest           |

*Continued on next page*

| Scientific name                | Common name                  | Habitat               |
|--------------------------------|------------------------------|-----------------------|
| <i>Catharus fuscescens</i>     | Veery                        | young forest          |
| <i>Catharus guttatus</i>       | Hermit Thrush                | forest                |
| <i>Hylocichla mustelina</i>    | Wood Thrush                  | forest                |
| <i>Seiurus aurocapilla</i>     | Ovenbird                     | forest                |
| <i>Helmitheros vermivorum</i>  | Worm-eating Warbler          | forest                |
| <i>Parkesia motacilla</i>      | Louisiana Waterthrush        | forest                |
| <i>Vermivora cyanoptera</i>    | Blue-winged Warbler          | early succession      |
| <i>Mniotilta varia</i>         | Black-and-white Warbler      | forest                |
| <i>Setophaga citrina</i>       | Hooded Warbler               | young forest          |
| <i>Setophaga ruticilla</i>     | American Redstart            | young forest          |
| <i>Setophaga cerulea</i>       | Cerulean Warbler             | forest                |
| <i>Setophaga petechia</i>      | Yellow Warbler               | open, edge            |
| <i>Setophaga pensylvanica</i>  | Chestnut-sided Warbler       | early succession      |
| <i>Setophaga discolor</i>      | Prairie Warbler              | early succession      |
| <i>Setophaga virens</i>        | Black-throated Green Warbler | forest                |
| <i>Cardellina canadensis</i>   | Canada Warbler               | forest                |
| <i>Piranga olivacea</i>        | Scarlet Tanager              | forest                |
| <i>Pheucticus ludovicianus</i> | Rose-breasted Grosbeak       | young forest          |
| <i>Icterus galbula</i>         | Baltimore Oriole             | open                  |
| <u>Short-distance migrants</u> |                              |                       |
| <i>Aix sponsa</i>              | Wood Duck                    | wooded wetland, ponds |
| <i>Buteo lineatus</i>          | Red-shouldered Hawk          | forest                |
| <i>Colaptes auratus</i>        | Northern Flicker             | open                  |
| <i>Sayornis phoebe</i>         | Eastern Phoebe               | open                  |
| <i>Vireo griseus</i>           | White-eyed Vireo             | early succession      |

*Continued on next page*

| Scientific name                | Common name            | Habitat          |
|--------------------------------|------------------------|------------------|
| <i>Troglodytes aedon</i>       | House Wren             | edge             |
| <i>Dumetella carolinensis</i>  | Gray Catbird           | generalist       |
| <i>Toxostoma rufum</i>         | Brown Thrasher         | early succession |
| <i>Geothlypis trichas</i>      | Common Yellowthroat    | early succession |
| <i>Pipilo erythrophthalmus</i> | Eastern Towhee         | early succession |
| <i>Spizella passerina</i>      | Chipping Sparrow       | open             |
| <i>Spizella pusilla</i>        | Field Sparrow          | early succession |
| <i>Agelaius phoeniceus</i>     | Red-winged Blackbird   | open             |
| <i>Quiscalus quiscula</i>      | Common Grackle         | open             |
| <i>Molothrus ater</i>          | Brown-headed Cowbird   | open             |
| <u>Permanent residents</u>     |                        |                  |
| <i>Colinus virginianus</i>     | Northern Bobwhite      | early succession |
| <i>Bonasa umbellus</i>         | Ruffed Grouse          | young forest     |
| <i>Buteo jamaicensis</i>       | Red-tailed Hawk        | open             |
| <i>Zenaida macroura</i>        | Mourning Dove          | open             |
| <i>Strix varia</i>             | Barred Owl             | forest           |
| <i>Melanerpes carolinus</i>    | Red-bellied Woodpecker | forest           |
| <i>Picoides pubescens</i>      | Downy Woodpecker       | generalist       |
| <i>Picoides villosus</i>       | Hairy Woodpecker       | forest           |
| <i>Dryocopus pileatus</i>      | Pileated Woodpecker    | forest           |
| <i>Cyanocitta cristata</i>     | Blue Jay               | generalist       |
| <i>Corvus brachyrhynchos</i>   | American Crow          | open             |
| <i>Corvus ossifragus</i>       | Fish Crow              | open             |
| <i>Poecile atricapillus</i>    | Black-capped Chickadee | generalist       |
| <i>Baeolophus bicolor</i>      | Tufted Titmouse        | generalist       |

*Continued on next page*

| Scientific name                 | Common name             | Habitat                |
|---------------------------------|-------------------------|------------------------|
| <i>Sitta canadensis</i>         | Red-breasted Nuthatch   | forest                 |
| <i>Sitta carolinensis</i>       | White-breasted Nuthatch | forest                 |
| <i>Certhia americana</i>        | Brown Creeper           | forest                 |
| <i>Thryothorus ludovicianus</i> | Carolina Wren           | edge                   |
| <i>Sialia sialis</i>            | Eastern Bluebird        | open                   |
| <i>Turdus migratorius</i>       | American Robin          | open                   |
| <i>Mimus polyglottos</i>        | Northern Mockingbird    | open                   |
| <i>Sturnus vulgaris</i>         | European Starling       | open                   |
| <i>Bombycilla cedrorum</i>      | Cedar Waxwing           | early succession       |
| <i>Melospiza melodia</i>        | Song Sparrow            | early succession, open |
| <i>Cardinalis cardinalis</i>    | Northern Cardinal       | Open edge              |
| <i>Haemorhous mexicanus</i>     | House Finch             | open                   |
| <i>Spinus tristis</i>           | American Goldfinch      | early succession       |

## References

- [1] R. M. DeGraaf and M Yamasaki. *New England wildlife: habitat, natural history, and distribution*. University Press of New England, Hanover, New Hampshire, 2001.
