# Supplementary material for: Estimating the Effects of Habitat and Biological Interactions in an Avian Community
Source: PubMed Central journal article supplement (PMC4543583; doi:10.1371/journal.pone.0135987), 2015-08-19
Supplement: pone.0135987.s005.pdf [file pone.0135987.s005.pdf]

# Estimating the effects of habitat and biological interactions in an avian community

**Robert M. Dorazio**, U.S. Geological Survey, Southeast Ecological Science Center, Gainesville, FL, USA

**Edward F. Connor**, Department of Biology, San Francisco State University, San Francisco, CA, USA

**Robert A. Askins**, Biology Department, Connecticut College, New London, CT USA

## S2 Table: Summary of avian counts by species

Observed frequency (no. surveys) of number of birds detected per survey.

| Species                       | Number of birds detected |    |    |    |    |   |   |
|-------------------------------|--------------------------|----|----|----|----|---|---|
|                               | 0                        | 1  | 2  | 3  | 4  | 5 | 6 |
| <i>Long-distance migrants</i> |                          |    |    |    |    |   |   |
| Broad-winged Hawk             | 240                      | 5  | 0  | 0  | 0  | 0 | 0 |
| Yellow-billed Cuckoo          | 223                      | 20 | 2  | 0  | 0  | 0 | 0 |
| Black-billed Cuckoo           | 237                      | 8  | 0  | 0  | 0  | 0 | 0 |
| Eastern Whip-poor-will        | 243                      | 2  | 0  | 0  | 0  | 0 | 0 |
| Ruby-throated Hummingbird     | 244                      | 1  | 0  | 0  | 0  | 0 | 0 |
| Eastern Wood-Pewee            | 142                      | 74 | 26 | 3  | 0  | 0 | 0 |
| Acadian Flycatcher            | 239                      | 6  | 0  | 0  | 0  | 0 | 0 |
| Great Crested Flycatcher      | 135                      | 87 | 23 | 0  | 0  | 0 | 0 |
| Eastern Kingbird              | 244                      | 0  | 1  | 0  | 0  | 0 | 0 |
| Yellow-throated Vireo         | 228                      | 17 | 0  | 0  | 0  | 0 | 0 |
| Red-eyed Vireo                | 95                       | 54 | 53 | 26 | 10 | 6 | 1 |
| Blue-gray Gnatcatcher         | 233                      | 10 | 2  | 0  | 0  | 0 | 0 |

*Continued on next page*

| Species                        | Number of birds detected |    |    |    |    |    |   |
|--------------------------------|--------------------------|----|----|----|----|----|---|
|                                | 0                        | 1  | 2  | 3  | 4  | 5  | 6 |
| Veery                          | 103                      | 78 | 44 | 17 | 3  | 0  | 0 |
| Hermit Thrush                  | 239                      | 4  | 1  | 1  | 0  | 0  | 0 |
| Wood Thrush                    | 93                       | 76 | 52 | 17 | 5  | 2  | 0 |
| Ovenbird                       | 58                       | 55 | 55 | 33 | 24 | 13 | 7 |
| Worm-eating Warbler            | 191                      | 43 | 9  | 2  | 0  | 0  | 0 |
| Louisiana Waterthrush          | 236                      | 9  | 0  | 0  | 0  | 0  | 0 |
| Blue-winged Warbler            | 227                      | 16 | 2  | 0  | 0  | 0  | 0 |
| Black-and-white Warbler        | 157                      | 66 | 20 | 2  | 0  | 0  | 0 |
| Hooded Warbler                 | 220                      | 17 | 6  | 2  | 0  | 0  | 0 |
| American Redstart              | 225                      | 17 | 2  | 1  | 0  | 0  | 0 |
| Cerulean Warbler               | 239                      | 6  | 0  | 0  | 0  | 0  | 0 |
| Yellow Warbler                 | 234                      | 10 | 1  | 0  | 0  | 0  | 0 |
| Chestnut-sided Warbler         | 241                      | 4  | 0  | 0  | 0  | 0  | 0 |
| Prairie Warbler                | 234                      | 7  | 2  | 2  | 0  | 0  | 0 |
| Black-throated Green Warbler   | 233                      | 11 | 1  | 0  | 0  | 0  | 0 |
| Canada Warbler                 | 237                      | 8  | 0  | 0  | 0  | 0  | 0 |
| Scarlet Tanager                | 114                      | 98 | 30 | 1  | 2  | 0  | 0 |
| Rose-breasted Grosbeak         | 226                      | 19 | 0  | 0  | 0  | 0  | 0 |
| Baltimore Oriole               | 198                      | 39 | 8  | 0  | 0  | 0  | 0 |
| <i>Short-distance migrants</i> |                          |    |    |    |    |    |   |
| Wood Duck                      | 244                      | 1  | 0  | 0  | 0  | 0  | 0 |
| Red-Shouldered Hawk            | 241                      | 4  | 0  | 0  | 0  | 0  | 0 |
| Northern Flicker               | 167                      | 69 | 9  | 0  | 0  | 0  | 0 |
| Eastern Phoebe                 | 231                      | 13 | 1  | 0  | 0  | 0  | 0 |

*Continued on next page*

| Species                           | Number of birds detected |     |    |    |   |   |   |
|-----------------------------------|--------------------------|-----|----|----|---|---|---|
|                                   | 0                        | 1   | 2  | 3  | 4 | 5 | 6 |
| White-eyed Vireo                  | 232                      | 10  | 2  | 0  | 1 | 0 | 0 |
| House Wren                        | 176                      | 36  | 23 | 8  | 2 | 0 | 0 |
| Gray Catbird                      | 182                      | 38  | 15 | 8  | 2 | 0 | 0 |
| Brown Thrasher                    | 242                      | 3   | 0  | 0  | 0 | 0 | 0 |
| Common Yellowthroat               | 167                      | 46  | 20 | 9  | 1 | 2 | 0 |
| Eastern Towhee                    | 66                       | 85  | 53 | 31 | 9 | 1 | 0 |
| Chipping Sparrow                  | 244                      | 1   | 0  | 0  | 0 | 0 | 0 |
| Field Sparrow                     | 244                      | 1   | 0  | 0  | 0 | 0 | 0 |
| Red-winged Blackbird              | 220                      | 17  | 7  | 0  | 1 | 0 | 0 |
| Common Grackle                    | 225                      | 16  | 3  | 1  | 0 | 0 | 0 |
| Brown-headed Cowbird              | 178                      | 64  | 3  | 0  | 0 | 0 | 0 |
| <i><u>Permanent residents</u></i> |                          |     |    |    |   |   |   |
| Northern Bobwhite                 | 221                      | 16  | 8  | 0  | 0 | 0 | 0 |
| Ruffed Grouse                     | 240                      | 4   | 1  | 0  | 0 | 0 | 0 |
| Red-tailed Hawk                   | 244                      | 1   | 0  | 0  | 0 | 0 | 0 |
| Mourning Dove                     | 211                      | 33  | 1  | 0  | 0 | 0 | 0 |
| Barred Owl                        | 243                      | 2   | 0  | 0  | 0 | 0 | 0 |
| Red-bellied Woodpecker            | 207                      | 36  | 2  | 0  | 0 | 0 | 0 |
| Downy Woodpecker                  | 185                      | 60  | 0  | 0  | 0 | 0 | 0 |
| Hairy Woodpecker                  | 213                      | 31  | 1  | 0  | 0 | 0 | 0 |
| Pileated Woodpecker               | 240                      | 4   | 1  | 0  | 0 | 0 | 0 |
| Blue Jay                          | 79                       | 114 | 44 | 7  | 1 | 0 | 0 |
| American Crow                     | 141                      | 74  | 22 | 5  | 2 | 0 | 1 |
| Fish Crow                         | 242                      | 2   | 1  | 0  | 0 | 0 | 0 |

*Continued on next page*

| Species                 | Number of birds detected |     |    |    |   |   |   |
|-------------------------|--------------------------|-----|----|----|---|---|---|
|                         | 0                        | 1   | 2  | 3  | 4 | 5 | 6 |
| Black-capped Chickadee  | 98                       | 114 | 29 | 3  | 1 | 0 | 0 |
| Tufted Titmouse         | 62                       | 109 | 56 | 18 | 0 | 0 | 0 |
| Red-breasted Nuthatch   | 244                      | 1   | 0  | 0  | 0 | 0 | 0 |
| White-breasted Nuthatch | 162                      | 80  | 3  | 0  | 0 | 0 | 0 |
| Brown Creeper           | 223                      | 20  | 2  | 0  | 0 | 0 | 0 |
| Carolina Wren           | 223                      | 21  | 1  | 0  | 0 | 0 | 0 |
| Eastern Bluebird        | 243                      | 2   | 0  | 0  | 0 | 0 | 0 |
| American Robin          | 185                      | 59  | 0  | 1  | 0 | 0 | 0 |
| Northern Mockingbird    | 230                      | 13  | 2  | 0  | 0 | 0 | 0 |
| European Starling       | 230                      | 10  | 4  | 0  | 1 | 0 | 0 |
| Cedar Waxwing           | 244                      | 1   | 0  | 0  | 0 | 0 | 0 |
| Song Sparrow            | 222                      | 19  | 3  | 1  | 0 | 0 | 0 |
| Northern Cardinal       | 145                      | 72  | 22 | 4  | 2 | 0 | 0 |
| House Finch             | 244                      | 0   | 1  | 0  | 0 | 0 | 0 |
| American Goldfinch      | 237                      | 8   | 0  | 0  | 0 | 0 | 0 |
