# Supplementary material for: Estimating the Effects of Habitat and Biological Interactions in an Avian Community
Source: PubMed Central journal article supplement (PMC4543583; doi:10.1371/journal.pone.0135987), 2015-08-19
Supplement: pone.0135987.s006.pdf [file pone.0135987.s006.pdf]

# Estimating the effects of habitat and biological interactions in an avian community

**Robert M. Dorazio**, U.S. Geological Survey, Southeast Ecological Science Center, Gainesville, FL, USA

**Edward F. Connor**, Department of Biology, San Francisco State University, San Francisco, CA, USA

**Robert A. Askins**, Biology Department, Connecticut College, New London, CT USA

## S3: Species-specific estimates of abundance parameters

Estimates of parameters related to expected abundance of each species. Asterisks indicate species whose estimates were computed using the multispecies N-mixture model. LPC1–LPC2 and VPC1–VPC4 indicate effects of covariates (principal components of landscape and vegetation, respectively) on expected abundance. Tabulated covariate effects differed significantly from zero (using 5% significance level) with exception of effect of LPC2 on Hermit Thrush and effect of LPC1 on Prairie Warbler. Asymptotic standard error or posterior standard deviation is given in parenthesis.

| Species                       | Intercept       | LPC1 | LPC2 | VPC1           | VPC2           | VPC3 | VPC4 |
|-------------------------------|-----------------|------|------|----------------|----------------|------|------|
| <i>Long-distance migrants</i> |                 |      |      |                |                |      |      |
| Broad-winged Hawk             | -4.72<br>(0.95) |      |      |                | 1.20<br>(0.53) |      |      |
| Yellow-billed Cuckoo          | -2.10<br>(0.28) |      |      | 0.39<br>(0.15) |                |      |      |
| Black-billed Cuckoo           | -1.42<br>(0.89) |      |      |                |                |      |      |
| Eastern Wood-Pewee            | -0.66           | 0.23 |      |                |                |      |      |

*Continued on next page*

| Species                  | Intercept | LPC1   | LPC2   | VPC1   | VPC2   | VPC3 | VPC4 |
|--------------------------|-----------|--------|--------|--------|--------|------|------|
|                          | (0.09)    | (0.05) |        |        |        |      |      |
| Acadian Flycatcher       | -3.65     |        |        |        |        |      |      |
|                          | (0.41)    |        |        |        |        |      |      |
| Great Crested Flycatcher | -0.54     |        |        |        |        |      |      |
|                          | (0.09)    |        |        |        |        |      |      |
| Eastern Kingbird         | -4.72     |        |        |        |        |      |      |
|                          | (0.72)    |        |        |        |        |      |      |
| Yellow-throated Vireo    | -3.91     | 1.06   |        |        |        |      |      |
|                          | (0.60)    | (0.25) |        |        |        |      |      |
| Red-eyed Vireo*          | 0.05      | 0.23   |        | -0.19  | 0.15   |      |      |
|                          | (0.07)    | (0.04) |        | (0.04) | (0.04) |      |      |
| Blue-gray Gnatcatcher    | -3.44     | 0.70   |        |        |        |      |      |
|                          | (0.45)    | (0.21) |        |        |        |      |      |
| Veery                    | -0.07     |        | -0.27  |        | 0.12   |      |      |
|                          | (0.07)    |        | (0.09) |        | (0.05) |      |      |
| Hermit Thrush            | -7.42     | 2.65   | -2.73  |        | -0.49  |      |      |
|                          | (2.31)    | (1.26) | (1.42) |        | (0.22) |      |      |
| Wood Thrush              | 0.02      | 0.22   |        |        |        |      |      |
|                          | (0.07)    | (0.04) |        |        |        |      |      |
| Ovenbird                 | 0.50      | 0.32   | -0.22  |        | 0.10   |      |      |
|                          | (0.05)    | (0.03) | (0.07) |        | (0.03) |      |      |
| Worm-eating Warbler      | -1.41     | 0.34   |        |        |        |      |      |
|                          | (0.14)    | (0.08) |        |        |        |      |      |
| Louisiana Waterthrush    | -2.06     |        |        |        |        |      |      |
|                          | (0.50)    |        |        |        |        |      |      |

*Continued on next page*

| Species                      | Intercept       | LPC1            | LPC2            | VPC1           | VPC2            | VPC3 | VPC4           |
|------------------------------|-----------------|-----------------|-----------------|----------------|-----------------|------|----------------|
| Blue-winged Warbler          | -2.25<br>(0.37) | -0.40<br>(0.14) |                 |                | 0.55<br>(0.20)  |      |                |
| Black-and-white Warbler      | -0.72<br>(0.10) |                 |                 | 0.24<br>(0.07) |                 |      |                |
| Hooded Warbler*              | -3.45<br>(0.53) | 0.48<br>(0.15)  |                 |                |                 |      | 0.72<br>(0.23) |
| American Redstart            | -1.67<br>(0.26) |                 |                 |                |                 |      |                |
| Cerulean Warbler             | -6.42<br>(1.53) | 1.30<br>(0.47)  |                 |                | 1.42<br>(0.56)  |      |                |
| Yellow Warbler               | -5.85<br>(1.28) | -2.16<br>(0.59) | -1.54<br>(0.61) |                |                 |      |                |
| Chestnut-sided Warbler       | -3.87<br>(0.51) |                 |                 |                |                 |      |                |
| Prairie Warbler*             | -5.13<br>(1.10) | -0.41<br>(0.24) |                 |                |                 |      |                |
| Black-throated Green Warbler | -4.36<br>(0.69) |                 |                 |                | -1.17<br>(0.24) |      |                |
| Canada Warbler               | -3.33<br>(0.36) |                 |                 |                |                 |      |                |
| Scarlet Tanager              | -0.39<br>(0.08) | 0.20<br>(0.05)  |                 |                |                 |      |                |
| Rose-breasted Grosbeak       | -2.38<br>(0.24) |                 |                 |                |                 |      |                |
| Baltimore Oriole             | -1.39           |                 |                 |                |                 |      |                |

*Continued on next page*

| Species                        | Intercept | LPC1   | LPC2   | VPC1   | VPC2   | VPC3 | VPC4   |
|--------------------------------|-----------|--------|--------|--------|--------|------|--------|
|                                | (0.14)    |        |        |        |        |      |        |
| <i>Short-distance migrants</i> |           |        |        |        |        |      |        |
| Northern Flicker               | -0.90     | -0.27  |        |        |        |      |        |
|                                | (0.13)    | (0.06) |        |        |        |      |        |
| Eastern Phoebe                 | -2.48     |        |        |        |        |      |        |
|                                | (0.30)    |        |        |        |        |      |        |
| White-eyed Vireo               | -4.01     | -1.03  |        |        |        |      |        |
|                                | (0.50)    | (0.18) |        |        |        |      |        |
| House Wren*                    | -1.36     | -0.43  |        |        |        |      |        |
|                                | (0.19)    | (0.07) |        |        |        |      |        |
| Gray Catbird*                  | -1.43     | -0.60  |        |        |        |      |        |
|                                | (0.17)    | (0.07) |        |        |        |      |        |
| Brown Thrasher                 | -3.84     |        |        |        |        |      |        |
|                                | (0.83)    |        |        |        |        |      |        |
| Common Yellowthroat            | -1.11     | -0.43  |        | 0.29   | 0.26   |      | -0.28  |
|                                | (0.13)    | (0.06) |        | (0.07) | (0.08) |      | (0.08) |
| Eastern Towhee                 | 0.23      |        |        | 0.28   |        |      |        |
|                                | (0.06)    |        |        | (0.04) |        |      |        |
| Field Sparrow                  | -5.41     |        |        |        |        |      |        |
|                                | (1.02)    |        |        |        |        |      |        |
| Red-winged Blackbird*          | -3.79     | -1.07  | -0.84  |        |        |      |        |
|                                | (0.61)    | (0.27) | (0.39) |        |        |      |        |
| Common Grackle                 | -1.59     | -0.39  |        |        |        |      |        |
|                                | (0.41)    | (0.12) |        |        |        |      |        |
| Brown-headed Cowbird           | -0.78     |        |        |        |        |      |        |

*Continued on next page*

| Species                    | Intercept | LPC1   | LPC2   | VPC1 | VPC2   | VPC3 | VPC4 |
|----------------------------|-----------|--------|--------|------|--------|------|------|
|                            | (0.16)    |        |        |      |        |      |      |
| <i>Permanent residents</i> |           |        |        |      |        |      |      |
| Northern Bobwhite          | -3.09     | -0.91  | -1.47  |      | 0.38   |      |      |
|                            | (0.39)    | (0.20) | (0.39) |      | (0.15) |      |      |
| Ruffed Grouse              | -8.03     | 3.09   | -3.56  |      |        |      |      |
|                            | (2.68)    | (1.41) | (1.66) |      |        |      |      |
| Mourning Dove              | -1.74     |        |        |      |        |      |      |
|                            | (0.18)    |        |        |      |        |      |      |
| Red-bellied Woodpecker     | -2.10     | 0.48   |        |      | 0.38   |      |      |
|                            | (0.25)    | (0.11) |        |      | (0.14) |      |      |
| Downy Woodpecker           | -0.99     |        |        |      |        |      |      |
|                            | (0.16)    |        |        |      |        |      |      |
| Hairy Woodpecker           | -1.88     |        |        |      |        |      |      |
|                            | (0.18)    |        |        |      |        |      |      |
| Pileated Woodpecker        | -3.62     |        |        |      |        |      |      |
|                            | (0.42)    |        |        |      |        |      |      |
| Blue Jay                   | 0.11      |        |        |      |        |      |      |
|                            | (0.07)    |        |        |      |        |      |      |
| American Crow*             | -0.51     | -0.19  |        |      |        |      |      |
|                            | (0.13)    | (0.06) |        |      |        |      |      |
| Fish Crow                  | -4.10     |        |        |      |        |      |      |
|                            | (0.5)     |        |        |      |        |      |      |
| Black-capped Chickadee     | -0.14     |        |        |      |        |      |      |
|                            | (0.08)    |        |        |      |        |      |      |
| Tufted Titmouse            | 0.18      |        |        |      |        |      |      |

*Continued on next page*

| Species                 | Intercept | LPC1   | LPC2   | VPC1 | VPC2   | VPC3   | VPC4 |
|-------------------------|-----------|--------|--------|------|--------|--------|------|
|                         | (0.06)    |        |        |      |        |        |      |
| Red-breasted Nuthatch   | -5.50     |        |        |      |        |        |      |
|                         | (1.00)    |        |        |      |        |        |      |
| White-breasted Nuthatch | -0.95     |        |        |      |        |        |      |
|                         | (0.11)    |        |        |      |        |        |      |
| Brown Creeper           | -2.65     |        |        |      | 0.68   | -0.52  |      |
|                         | (0.34)    |        |        |      | (0.20) | (0.20) |      |
| Carolina Wren           | -2.74     | -0.59  |        |      |        |        |      |
|                         | (0.31)    | (0.14) |        |      |        |        |      |
| American Robin          | -0.93     |        |        |      |        |        |      |
|                         | (0.16)    |        |        |      |        |        |      |
| Northern Mockingbird    | -2.96     | -0.48  |        |      |        |        |      |
|                         | (0.32)    | (0.15) |        |      |        |        |      |
| European Starling*      | -3.88     | -0.85  |        |      |        |        |      |
|                         | (0.69)    | (0.21) |        |      |        |        |      |
| Cedar Waxwing           | -5.41     |        |        |      |        |        |      |
|                         | (1.02)    |        |        |      |        |        |      |
| Song Sparrow            | -3.55     | -1.26  | -0.94  |      |        |        |      |
|                         | (0.52)    | (0.27) | (0.34) |      |        |        |      |
| Northern Cardinal       | -0.58     | -0.31  |        |      |        |        |      |
|                         | (0.10)    | (0.05) |        |      |        |        |      |
| House Finch             | -4.47     |        |        |      |        |        |      |
|                         | (0.84)    |        |        |      |        |        |      |
| American Goldfinch      | -2.14     |        |        |      |        |        |      |
|                         | (0.89)    |        |        |      |        |        |      |
