# Supplementary material for: Estimating the Effects of Habitat and Biological Interactions in an Avian Community
Source: PubMed Central journal article supplement (PMC4543583; doi:10.1371/journal.pone.0135987), 2015-08-19
Supplement: pone.0135987.s007.pdf [file pone.0135987.s007.pdf]

# Estimating the effects of habitat and biological interactions in an avian community

**Robert M. Dorazio**, U.S. Geological Survey, Southeast Ecological Science Center, Gainesville, FL, USA

**Edward F. Connor**, Department of Biology, San Francisco State University, San Francisco, CA, USA

**Robert A. Askins**, Biology Department, Connecticut College, New London, CT USA

## S4 Table: Species-specific estimates of detection parameters

Estimates of parameters related to detection probability of each species. Asterisks indicate species whose estimates were computed using the multispecies N-mixture model. Tabulated day-of-year effects differed significantly from zero (using 5% significance level). Asymptotic standard error or posterior standard deviation is given in parenthesis.

| Species                              | Intercept       | Day of year     |
|--------------------------------------|-----------------|-----------------|
| <u><i>Long-distance migrants</i></u> |                 |                 |
| Broad-winged Hawk                    | -0.81<br>(0.62) |                 |
| Yellow-billed Cuckoo                 | -1.11<br>(0.32) |                 |
| Black-billed Cuckoo                  | -3.73<br>(1.06) | -1.05<br>(0.43) |
| Eastern Wood-Pewee                   | 0.57<br>(0.09)  |                 |
| Acadian Flycatcher                   | 0.04            |                 |

*Continued on next page*

| Species                  | Intercept | Day of year |
|--------------------------|-----------|-------------|
|                          | (0.46)    |             |
| Great Crested Flycatcher | -0.02     |             |
|                          | (0.1)     |             |
| Eastern Kingbird         | -0.18     |             |
|                          | (0.82)    |             |
| Yellow-throated Vireo    | -0.34     |             |
|                          | (0.29)    |             |
| Red-eyed Vireo*          | 0.43      |             |
|                          | (0.06)    |             |
| Blue-gray Gnatcatcher    | -0.18     |             |
|                          | (0.31)    |             |
| Veery                    | 0.25      |             |
|                          | (0.07)    |             |
| Hermit Thrush            | 0.38      |             |
|                          | (0.37)    |             |
| Wood Thrush              | 0.41      |             |
|                          | (0.07)    |             |
| Ovenbird                 | 0.67      |             |
|                          | (0.05)    |             |
| Worm-eating Warbler      | 0.02      |             |
|                          | (0.14)    |             |
| Louisiana Waterthrush    | -2.76     | -1.16       |
|                          | (0.74)    | (0.44)      |
| Blue-winged Warbler      | -1.85     | -1.47       |
|                          | (0.40)    | (0.35)      |

*Continued on next page*

| Species                      | Intercept       | Day of year     |
|------------------------------|-----------------|-----------------|
| Black-and-white Warbler      | -0.34<br>(0.11) |                 |
| Hooded Warbler*              | 0.32<br>(0.18)  |                 |
| American Redstart            | -1.63<br>(0.38) | -1.06<br>(0.27) |
| Cerulean Warbler             | -0.63<br>(0.58) | -2.65<br>(0.91) |
| Yellow Warbler               | -1.21<br>(0.47) |                 |
| Chestnut-sided Warbler       | 2.13<br>(1.53)  | -4.07<br>(1.92) |
| Prairie Warbler*             | -0.03<br>(0.27) |                 |
| Black-throated Green Warbler | -0.64<br>(0.36) |                 |
| Canada Warbler               | -0.18<br>(0.41) |                 |
| Scarlet Tanager              | 0.20<br>(0.09)  |                 |
| Rose-breasted Grosbeak       | -0.56<br>(0.29) |                 |
| Baltimore Oriole             | -0.22<br>(0.16) |                 |

*Short-distance migrants*

*Continued on next page*

| Species               | Intercept       | Day of year     |
|-----------------------|-----------------|-----------------|
| Northern Flicker      | -0.77<br>(0.15) |                 |
| Eastern Phoebe        | -0.94<br>(0.38) |                 |
| White-eyed Vireo      | 0.32<br>(0.26)  |                 |
| House Wren*           | 0.81<br>(0.11)  |                 |
| Gray Catbird*         | 0.07<br>(0.11)  |                 |
| Brown Thrasher        | -1.45<br>(1.03) |                 |
| Common Yellowthroat   | 0.12<br>(0.10)  |                 |
| Eastern Towhee        | 0.25<br>(0.06)  |                 |
| Field Sparrow         | -0.18<br>(1.16) |                 |
| Red-winged Blackbird* | 0.01<br>(0.19)  |                 |
| Common Grackle        | -1.99<br>(0.45) |                 |
| Brown-headed Cowbird  | -1.28<br>(0.20) | -0.41<br>(0.14) |

*Permanent residents*

*Continued on next page*

| Species                | Intercept       | Day of year    |
|------------------------|-----------------|----------------|
| Northern Bobwhite      | 0.30<br>(0.19)  |                |
| Ruffed Grouse          | -1.01<br>(0.61) |                |
| Mourning Dove          | -0.65<br>(0.22) |                |
| Red-bellied Woodpecker | -0.67<br>(0.21) |                |
| Downy Woodpecker       | -1.17<br>(0.20) |                |
| Hairy Woodpecker       | -0.26<br>(0.21) | 0.45<br>(0.18) |
| Pileated Woodpecker    | -0.18<br>(0.48) |                |
| Blue Jay               | -0.58<br>(0.09) |                |
| American Crow*         | -0.58<br>(0.11) | 0.26<br>(0.11) |
| Fish Crow              | 0.75<br>(0.56)  |                |
| Black-capped Chickadee | -0.36<br>(0.09) | 0.30<br>(0.09) |
| Tufted Titmouse        | -0.03<br>(0.07) |                |
| Red-breasted Nuthatch  | 1.08            |                |

*Continued on next page*

| Species                 | Intercept | Day of year |
|-------------------------|-----------|-------------|
|                         | (1.18)    |             |
| White-breasted Nuthatch | -0.22     |             |
|                         | (0.13)    |             |
| Brown Creeper           | -0.76     |             |
|                         | (0.28)    |             |
| Carolina Wren           | -0.36     |             |
|                         | (0.25)    |             |
| American Robin          | -1.22     | 0.40        |
|                         | (0.20)    | (0.16)      |
| Northern Mockingbird    | 0.13      |             |
|                         | (0.27)    |             |
| European Starling*      | -0.89     |             |
|                         | (0.30)    |             |
| Cedar Waxwing           | -0.18     |             |
|                         | (1.16)    |             |
| Song Sparrow            | -0.18     |             |
|                         | (0.22)    |             |
| Northern Cardinal       | -0.48     |             |
|                         | (0.11)    |             |
| House Finch             | -1.01     |             |
|                         | (1.06)    |             |
| American Goldfinch      | -2.47     |             |
|                         | (1.01)    |             |
